# Supplementary material
Source: PubMed Central journal article supplement (PMC7093223)
Supplement: NIHMS1547058-supplement-1.pdf [file NIHMS1547058-supplement-1.pdf]

**Supplemental Table S1a. Models to assess impact of body composition and sex on calcified plaque indices among persons with HIV**

|                                   | CAC score                                |         | Total Calcified Plaque Volume            |         |
|-----------------------------------|------------------------------------------|---------|------------------------------------------|---------|
|                                   | $\beta$ estimate                         | P Value | $\beta$ estimate                         | P Value |
|                                   | <b>Model 1</b> ( $r^2=0.13$ , $P=.005$ ) |         | <b>Model 1</b> ( $r^2=0.13$ , $P=.005$ ) |         |
| VAT to SAT ratio <sup>a</sup>     | 58.224                                   | .0008   | 49.908                                   | .0007   |
| Male Sex                          | -5.628                                   | .49     | -5.204                                   | .47     |
| CD4 T cell count (cells/ $\mu$ l) | -0.003                                   | .90     | -0.002                                   | .90     |
| HIV VL (copies/mL)                | 0.002                                    | .62     | 0.001                                    | .67     |
|                                   | <b>Model 2</b> ( $r^2=0.07$ , $P=.05$ )  |         | <b>Model 2</b> ( $r^2=0.07$ , $P=.06$ )  |         |
| VAT (cm <sup>2</sup> )            | 0.140                                    | .04     | 0.121                                    | .04     |
| Male Sex                          | 9.009                                    | .24     | 7.388                                    | .28     |
| CD4 T cell count (cells/ $\mu$ l) | -0.009                                   | .70     | -0.008                                   | .68     |
| HIV VL (copies/mL)                | 0.001                                    | .80     | 0.001                                    | .87     |
|                                   | <b>Model 3</b> ( $r^2=0.06$ , $P=.13$ )  |         | <b>Model 3</b> ( $r^2=0.06$ , $P=.14$ )  |         |
| SAT (cm <sup>2</sup> )            | -0.077                                   | .16     | -0.071                                   | .14     |
| Male Sex                          | 11.565                                   | .13     | 9.729                                    | .15     |
| CD4 T cell count (cells/ $\mu$ l) | 0.004                                    | .85     | 0.004                                    | .85     |
| HIV VL (copies/mL)                | 0.002                                    | .67     | 0.001                                    | .74     |

Abbreviations: CAC, coronary artery calcium; VAT, visceral adipose tissue; SAT, subcutaneous adipose tissue; VL, viral load.

<sup>a</sup>9 outliers excluded for change as per Tukey Method

**Supplemental Table S1b. Models to assess impact of body composition, sex, and traditional CVD risk factors on calcified plaque indices among persons with HIV**

|                                           | CAC score                                 |         | Total Calcified Plaque Volume             |         |
|-------------------------------------------|-------------------------------------------|---------|-------------------------------------------|---------|
|                                           | $\beta$ estimate                          | P Value | $\beta$ estimate                          | P Value |
|                                           | <b>Model 1</b> ( $r^2=0.21$ , $P=.0001$ ) |         | <b>Model 1</b> ( $r^2=0.22$ , $P<.0001$ ) |         |
| VAT to SAT ratio <sup>a</sup>             | 47.703                                    | .006    | 39.996                                    | .006    |
| Male Sex                                  | -10.603                                   | .19     | -9.500                                    | .18     |
| Framingham estimate of 10-yr CHD risk (%) | 3.781                                     | .007    | 3.465                                     | .004    |
| CD4 T cell count (cells/ $\mu$ l)         | -0.005                                    | .81     | -0.004                                    | .81     |
| HIV VL (copies/mL)                        | 0.011                                     | .09     | 0.009                                     | .12     |
|                                           | <b>Model 2</b> ( $r^2=0.18$ , $P=.0004$ ) |         | <b>Model 2</b> ( $r^2=0.19$ , $P=.0004$ ) |         |
| VAT (cm <sup>2</sup> )                    | 0.140                                     | .05     | 0.119                                     | .05     |
| Male Sex                                  | -0.378                                    | .96     | -0.827                                    | .91     |
| Framingham estimate of 10-yr CHD risk (%) | 4.520                                     | .003    | 4.075                                     | .002    |
| CD4 T cell count (cells/ $\mu$ l)         | -0.011                                    | .61     | -0.010                                    | .58     |
| HIV VL (copies/mL)                        | 0.012                                     | .12     | 0.009                                     | .16     |
|                                           | <b>Model 3</b> ( $r^2=0.16$ , $P=.001$ )  |         | <b>Model 3</b> ( $r^2=0.17$ , $P=.0009$ ) |         |
| SAT (cm <sup>2</sup> )                    | -0.063                                    | .24     | -0.060                                    | .21     |
| Male Sex                                  | 1.542                                     | .84     | 0.851                                     | .90     |
| Framingham estimate of 10-yr CHD risk (%) | 5.027                                     | .0008   | 4.501                                     | .0004   |
| CD4 T cell count (cells/ $\mu$ l)         | -0.001                                    | .98     | -0.001                                    | .96     |
| HIV VL (copies/mL)                        | 0.001                                     | .20     | 0.008                                     | .25     |

Abbreviations: CAC, coronary artery calcium; VAT, visceral adipose tissue; SAT, subcutaneous adipose tissue; VL, viral load.

<sup>a</sup>9 outliers excluded for change as per Tukey Method
